# Supplementary material for: Development of a highly efficient Axiom™ 70 K SNP array for Pyrus and evaluation for high-density mapping and germplasm characterization
Source: BMC Genomics. 2019 May 2;20:331. doi: 10.1186/s12864-019-5712-3 (PMC6498479; doi:10.1186/s12864-019-5712-3)
Supplement: Supplementary file 6 — Concordance Check results for the samples of the screening panel. Pairwise concordance values 97% are reported, for a total of 19 groups of duplicated samples (three ‘Bartlett’ pairwise concordances count as one group). Putative sampling errors were verified by SSR analysis. (XLSX 11 kb) [file 12864_2019_5712_MOESM6_ESM.xlsx]

## Sheet: Sheet1
Table S6. Concordance Check results for the samples of the screening panel. Pairwise concordance values > 97% are reported, for a total of 19 groups of duplicated samples (three 'Bartlett' pairwise concordances count as one group). Putative sampling errors were verified by SSR analysis.
	Base		Reference
Group of duplicates	Inventory #	Plant Name	Inventory #	Plant Name	%Concordance	Comments	SSR
1	DH sequenced (plate 1)	DH sequenced	DHsequenced (plate 3)	DH sequenced	100	Techincal replicates	no
2	CPYR 2623.001 (plate 1)	'Dan Bae' (Olympic)	CPYR 2623.001 (plate 2)	'Dan Bae' (Olympic)	100	Techincal replicates	no
3	CPYR 38.001 (plate 1)	'Bartlett'	CPYR 38.001 (plate 2)	'Bartlett'	99.999	Techincal replicates	no
3	CPYR 38.001 (plate 1)	'Bartlett'	CPYR 38.001 (plate 3)	'Bartlett'	99.999	Techincal replicates	no
3	CPYR 38.001 (plate 2)	'Bartlett'	CPYR 38.001 (plate 3)	'Bartlett'	99.999	Techincal replicates	no
4	BU2/33-Pyro II	BU 2/33 - Pyro II	CPYR 1165.001	Bosc - OP-5	99.984	Sampling error	no
5	CPYR 1675.003	'Takisha'	CPYR 1674.002	P. communis ssp. pyraster - Serbia	99.983	Confirmed identical	yes
6	CPYR 2518.001	'Potomac'	Harrow Sweet	'Harrow Sweet'	99.982	Harrow Sweet error †	no
7	CPYR 1628.001	'Tikvaca'	CPYR 1664.001	'Poznica'	99.981	Confirmed identical	yes
8	CPYR 655.001	OPR-113 P. betulaefolia No. 4	CPYR 684.001	P. communis ssp. caucasica - Ukraine	99.96	Sampling error	yes
9	CPYR 1119.001	'Meigetsu'	CPYR 2785.001	'Bai Li'	99.96	Confirmed identical	yes
10	CPYR 75.002	'Beurré Easter'	P0069	'Doyenné d'Hiver'	99.951	Known synonyms	no
11	CPYR 431.001	'Old Home'	CPYR 2104.001	'Fox'	99.95	Confirmed identical	yes
12	CPYR 1181.001	'Kumoi'	CPYR 378.002	'Man Yuan Xiang' [Man Yuan Hsiang]	99.94	Confirmed identical	yes
13	CPYR 584.001	'Tse Li'	CPYR 1177.001	'Tsu Li'	99.934	Known synonyms	no
14	CPYR 2732.001	'Le Conte'	CPYR 124.002	Campas No.1	99.932	Confirmed identical	yes
15	CPYR 306.001	'Jubilee'	CPYR 573.002	'Tioma'	99.922	Confirmed identical ‡	yes
16	CPYR 787.001	P. gharbiana No. 1	CPYR 1621.001	P. gharbiana	99.915	Known synonyms	no
17	CPYR 529.001	'Shinsui'	CPYR 528.001	'Shinseiki'	99.906	Sampling error	yes
18	CPYR 268.001	'Hang Pa Li'	CPYR 2547.001	'Changpa Li'	99.899	Known synonyms	no
19	CPYR 2106.002	'Louise Bonne d'Avranches'	CPYR 63.001	'Anjou'	99.867	CPYR 2106.002 error §	yes
† 'Harrow Sweet' used in the screening panel originated form the AFRS breeding program. 'Harrow Sweet' from the NCGR was confrimed to be different from 'Potomac' at SSR analysis.
‡ While SSR analysis confirmed these two trees to be identical, they have different fruit morphology.
§ While SSR analysis confrimed these two trees to be identical, 'Louise Bonne d'Avranches' is a cultivar known to be different from 'Anjou' and other sources exists in the NCGR.
